# Supplementary material for: Sea Breeze-Driven Daytime Vertical Distributions of Air Pollutants and Photochemical Implications in an Island Environment
Source: Copernicus journal article supplement (doi:10.5194/egusphere-2025-2588), 2025-08-14
Supplement: Supplementary file [file egusphere-2025-2588-AC2-supplement.pdf]

## Response to Comments from Reviewer #2

We thank you for the constructive comments and suggestions, which are very positive to improve scientific contents of the manuscript. We have revised the manuscript appropriately and addressed your comments point-by-point for consideration as below. The remarks from yours are shown in black, our responses (in blue) and the corresponding edits in the manuscript (in red) are shown below. All the page and line numbers mentioned following are refer to the revised manuscript without change tracked.

Reviewer #2: Li et al. combine MAX-DOAS observations with an objective sea-land breeze identification algorithm to characterize pollutants, e.g. NO<sub>2</sub>, HCHO, CHOCHO, spatiotemporal distributions and photochemical indicators for an island environment under distinct airflow regimes, including sea breezes and typhoons. The results prove the critical role of local meteorology in modulating pollution levels, vertical profiles, and further photochemical indicators (FNR and GNR), which are influencing the ozone formation sensitivity across different altitudes. These findings provide valuable insights into the interplay between meteorological dynamics and atmospheric chemistry in tropical coastal environments. Overall, the manuscript is logically organized, clearly illustrated, and well-written. I recommend its acceptance after minor revisions addressing the following points.

R: We would like to express our sincere gratitude for your careful review and for the insightful and constructive comments provided. We also greatly appreciate your positive and encouraging remarks regarding the overall quality and presentation of our work. Your feedbacks are crucial in helping us improve the clarity and coherence of the manuscript. We have carefully addressed all the suggestions and made corresponding revisions, which we believe have further strengthened the paper.

Specific comments:

1. P1, L15: Hainan→Hainan, China

R: Thank you for your comment. We have revised the text to read "Hainan, China" as suggested and please refer to Line 15.

2. P1, L22: “existing OFS classifications” is unclear. Does it mean the classification methodology or the thresholds?

R: Thank you for your comment. We recognize that the original wording could be ambiguous, and we have revised the text to clarify that "existing OFS classifications" refers specifically to the classification thresholds. Please refer to Line 22-24.

"Elevated FNR and GNR thresholds suggest that existing OFS classification thresholds are inadequate for low-NO<sub>2</sub> tropical coastal rural areas, underscoring the need for

region-specific assessments."

3. P1, Abstract: it could briefly clarify the observational period or duration (e.g., season or year), which would help readers contextualize the results temporally.

R: Thank you for your comment. We have added the observational period in the Abstract to better contextualize the study temporally. Please refer to Line 13-16.

"Utilizing Multi-Axis Differential Optical Absorption Spectroscopy (MAX-DOAS) and a sea-land breeze objective identification algorithm, we reveal distinct spatiotemporal patterns in NO<sub>2</sub>, HCHO, CHOCHO, and associated photochemistry under varying airflow patterns in a rural coastal area of Hainan, China during the summer of 2024."

4. P2, L37-38: As described, the MAX-DOAS method has been successfully applied for atmospheric compositions monitoring. How about the performances especially for NO<sub>2</sub>, HCHO and CHOCHO?

R: Thank you for your comment. We have added a short discussion on the performances of MAX-DOAS retrievals for NO<sub>2</sub>, HCHO, and CHOCHO in the revised manuscript. Specifically, as a mature optical remote sensing technique, MAX-DOAS has been widely applied for monitoring tropospheric trace gases. This method provides high sensitivity and accuracy in detecting atmospheric constituents and enables the retrieval of vertical distribution profiles, making it a powerful tool in studies of air pollution mechanisms, model and satellite validation, and source characterization (B. Ren et al., 2021; H. Ren et al., 2021; Tan et al., 2018).

For NO<sub>2</sub> and HCHO, the MAX-DOAS technique has established well-validated retrieval frameworks. Numerous studies have demonstrated that MAX-DOAS-derived vertical column densities and surface concentrations show good agreements with those from satellite observations and in situ measurements (Chan et al., 2020; Jiang et al., 2025; Kumar et al., 2020; Martin et al., 2004; Schreier et al., 2020; Wagner et al., 2011). Furthermore, MAX-DOAS has proven capable of providing stable long-term observations of NO<sub>2</sub> and HCHO even under complex atmospheric conditions such as mountainous regions, open oceans, and typhoon environments (Schreier et al., 2016; Zhang et al., 2022).

For CHOCHO, whose concentrations in the atmosphere are relatively low and difficult to monitor by conventional methods, MAX-DOAS remains one of the few ground-based techniques capable of reliable detection. Despite challenges from noise and spectral interferences, successful retrievals of CHOCHO have been reported in both urban and forest environments, yielding valuable insights into its photochemical behavior and its ratio to HCHO (Hong et al., 2024; Hoque et al., 2018; Liu et al., 2021; Schreier et al., 2020; Zhang et al., 2025). In addition, CHOCHO measurements from MAX-DOAS have been effectively used to validate satellite products such as TROPOMI and OMI (Lerot et al., 2021).

In summary, MAX-DOAS demonstrates robust and reliable performance in monitoring NO<sub>2</sub>, HCHO, and CHOCHO, providing strong methodological support for the data quality in this study. Please refer to Line 40-48.

"Previous studies reported that well-established retrieval frameworks for NO<sub>2</sub> and HCHO have shown good agreement with satellite and in situ measurements, demonstrating its robustness for long-term and multi-environment observations (Chan et al., 2020; Jiang et al., 2025; Kumar et al., 2020; Martin et al., 2004; Schreier et al., 2020; Schreier et al., 2016; Wagner et al., 2011; Zhang et al., 2022). CHOCHO is challenging to detect due to its weak absorption and spectral interferences, yet MAX-DOAS remains one of the few ground-based techniques capable of reliable retrievals. Successful measurements in both urban and biogenic regions have advanced understanding of CHOCHO photochemistry, which also were validate satellite products (Hong et al., 2024; Hoque et al., 2018; Lerot et al., 2021; Liu et al., 2021; Schreier et al., 2020; Zhang et al., 2025). Overall, MAX-DOAS demonstrates robust and reliable performance in monitoring NO<sub>2</sub>, HCHO, and CHOCHO, providing strong methodological support for the data quality in this study."

5. P2, L44, "elevated R<sub>GF</sub> at higher altitudes" means even more glyoxal and less formaldehyde, what is the relationship between this ratio variation and anthropogenic VOCs?

R: Thank you for your comment. Indeed, the R<sub>GF</sub> is used to identify the dominance of BVOCs or AVOCs emission (Chan Miller et al., 2014; Chen et al., 2023; DiGangi et al., 2012; Kaiser et al., 2015; MacDonald et al., 2012; Vrekoussis et al., 2010; Xing et al., 2020). It reported that higher R<sub>GF</sub> values are associated with anthropogenic sources; for example, [ENREF\\_17](#)Vrekoussis et al. (2010) report R<sub>GF</sub> < 0.04 in isoprene-dominated areas and substantially higher values where biomass burning, monoterpene emissions, or anthropogenic emissions prevail. This threshold has been supported by subsequent studies (Chen et al., 2023). Moreover, numerous studies have reported a gradual increase in the R<sub>GF</sub> with altitude within the 0-3 km layer (Baidar et al., 2013; Hong et al., 2022; Zhang et al., 2025), with values in the free troposphere even exceeding those in the boundary layer (Kaiser et al., 2015).

6. P3, L57: distribution? Or formation?

R: Thank you for your comment. Upon careful review, we found that the original term "distribution" was used incorrectly here. The intended meaning is "formation," and this has been corrected in the revised manuscript. Please refer to Line 67.

7. P3, L62: Please add a full stop between "layers" and "Nevertheless"

R: Thank you for your comment. We have added a full stop between "layers" and "Nevertheless" in the revised manuscript. Please refer to Line 72.

8. P4, L83: altitude .... above sea level

R: Thank you for your comment. We have revised the sentence to clarify the altitude reference as "above sea level." Please refer to Line 97.

9. P4, L94-95: What is RMS? And why did higher error thresholds set for HCHO and CHOCHO?

R: Thank you for your comment. RMS refers to the root-mean-square residual between the measured and fitted differential optical absorption spectra, which reflects the quality of spectral fitting. We have added the full form of the abbreviation for clarity and please refer to Line 110-111.

"Quality control excluded retrievals with Root Mean Square (RMS) > 0.001 and DSCD error to DSCD ratios exceeding 10% (30% for HCHO, 50% for CHOCHO)."

Higher DSCD error to DSCD ratios thresholds were set for HCHO and CHOCHO because their absorption structures are relatively weaker and more susceptible to spectral interferences compared with aerosol and NO<sub>2</sub> (Jiang et al., 2025; Schreier et al., 2020). Therefore, a slightly relaxed threshold ensures sufficient data coverage while maintaining acceptable retrieval accuracy.

10. P5, L110: Regarding the surface concentration of the a priori profile, is it reasonable to set HCHO even higher than as twice as NO<sub>2</sub> and twenty as HCHO? How the surface concentration of the a priori profile influencing the profile retrieval?

R: Thank you for your comment. The prior surface concentrations (SC) of NO<sub>2</sub>, HCHO, and CHOCHO (2, 5, and 0.2 ppbv) were selected based on typical background conditions in the study region. A foreseeable feature of the study region is that its rural setting leads to relatively low NO<sub>2</sub> levels, whereas strong biogenic emissions compensate for this and result in HCHO and CHOCHO concentrations comparable to those reported in some urban areas. CHOCHO is generally about one-twentieth of HCHO, with previous studies even setting it as low as one-sixtieth (Xing et al., 2020; Zhang et al., 2025). Therefore, the SC selected by this study is scientifically sound and supported by ample literature evidence.

To assess the impact of the prior SC, we first surveyed a wide range of published MAX-DOAS studies and summarized the commonly used values: typical priors for NO<sub>2</sub> include 1, 2, 5, and 10 ppbv (Hong et al., 2024; Jiang et al., 2025; Xing et al., 2022; Xing et al., 2020; Zhang et al., 2021); for HCHO, 1, 3, and 5 ppbv are frequently adopted and CHOCHO commonly used values are 0.05, 0.1, 0.2, and 0.5 ppbv (Hong et al., 2024; Xing et al., 2022; Xing et al., 2020; Zhang et al., 2025). We performed sensitivity tests across these values (Fig. R1). The results show that higher priors increase the retrieved near-surface values, but the influence gradually stabilizes. Vertical profiles of HCHO and CHOCHO become increasingly similar as they approach

realistic ambient concentrations. CHOCHO, however, exhibits substantially larger variability: its ambient concentrations are low and its absorption features are weak, so measurement noise—especially at higher altitudes—has a non-negligible impact on the retrieved profiles. NO<sub>2</sub>, owing to its stronger absorption features and higher sensitivity near the surface, provides tighter observational constraints. As a result, increases in the SC lead to only modest changes aloft.

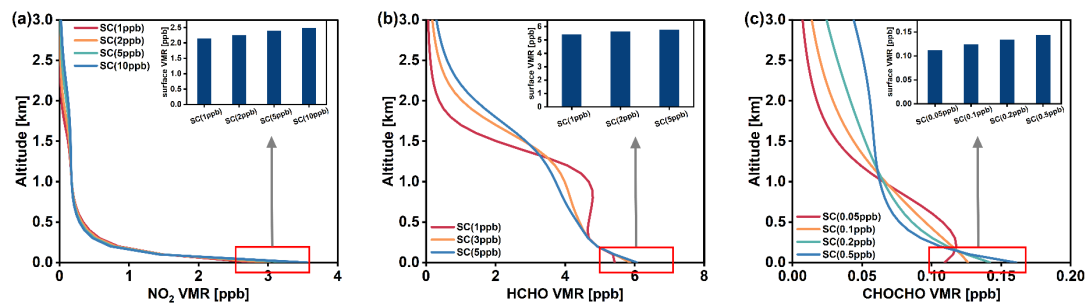

**Figure R1.** Example of profile retrievals for (a) NO<sub>2</sub>, (b) HCHO, and (c) CHOCHO on 15 June 2024. The a priori surface concentrations (SC) were set to 2, 5, and 0.2 ppbv as the baseline values, and additional sensitivity tests were conducted using alternative priors within the ranges commonly reported in literature: NO<sub>2</sub> (1, 2, 5, 10 ppbv), HCHO (1, 3, 5 ppbv), and CHOCHO (0.05, 0.1, 0.2, 0.5 ppbv). The corresponding retrieved surface concentrations (averaged over 0–100 m) are shown in the upper-right panels.

The differences in vertical profile shapes under varying prior SC mainly stem from the structure of the optimal estimation framework. When the prior is low, the upper parts of the HCHO and CHOCHO profiles are dominated by the prior because MAX-DOAS sensitivity decreases rapidly with altitude. In this case, the inversion reduces the cost function by increasing concentrations in the highly sensitive lower layers while keeping the upper layers close to the prior. For example, with particularly low priors for HCHO (SC=1 ppb) and CHOCHO (SC=0.05 ppb), the observational constraint aloft becomes very weak, causing the upper layers to revert almost entirely to the prior, whereas the lower layers are substantially elevated by the measurements. This characteristic pattern and the underlying OEM behavior have been extensively discussed in previous studies (Frieß et al., 2019; Vlemmix et al., 2015; Wang et al., 2013).

Overall, the setting of the prior profile fully accounts for the typical atmosphere background and source characteristics of the study region, as well as the known altitude-dependent sensitivity of MAX-DOAS retrievals. The selected prior values fall well within the ranges reported in previous studies and behave consistently with the expected optimal estimation response. Therefore, the a priori settings used in this work are scientifically sound and reliable.

11. P5, L115: The unit for ozone should be corrected.

R: Thank you for your comment. We have corrected the unit for ozone to the appropriate one in the revised manuscript. Please refer to Line 131.

12. Fig 1: the label for typhoon track should be added in Fig. 1a.

R: Thank you for your comment. We have added the label for the typhoon track in Fig. 1a in the revised manuscript.

13. P6, Line127-132: There are two sentences with a certain degree of repeatability.

R: Thank you for your comment. We have revised the sentences to remove redundancy.

14. P7, Line 140: Please supplement a wind rose plot for the campaign, better with a separate daytime and nighttime one.

R: Thank you for your comment. We have plotted the wind rose for daytime and nighttime during the observation period (Fig. R2) and included in the Supplementary Material as Fig. S4. The description in the manuscript has also been updated and please refer to Line 154-156.

"Notably, during summer, the island is predominantly influenced by the southwesterly monsoon, which frequently produces daytime background winds oriented landward or along the coast (Fig. S4)."

In supplementary materials:

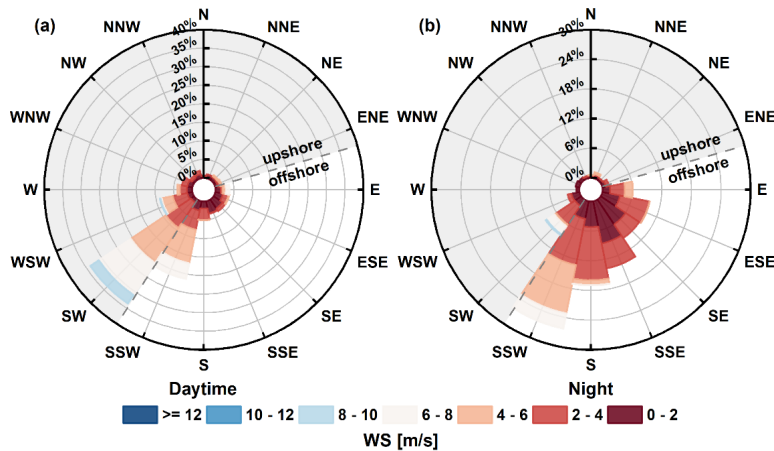

**Figure R2.** Wind rose plots during the observation period for daytime (a) and night (b). The gray shaded area indicates upshore WD, and the gray dashed line represents the coastline. WD is plotted in polar coordinates with percentage frequency indicated by concentric circles.

15. P7, Sect. 2.2 and 2.3: Regarding the identification of SBL, there are two questions: 1) how to evaluate the identification performance? Can it be validated? 2) how about the representativeness of the meteorological data used in the identification? Would it cause some uncertainties?

R: Thank you for your comment. Regarding the first question, the filtering method employed in this study is a well-established approach for identifying SBDs. To evaluate its performance, we randomly selected four days identified by the algorithm as SB events and analyzed the diurnal variations in surface WS, WD, temperature, RH, total

precipitation (TP), and surface pressure (SP) (Fig. R3). The results clearly show that all cases exhibited typical daytime sea breeze penetration and nighttime land breeze development, characterized by distinct wind shifts accompanied by either temperature drops or RH increases upon the arrival of the SB.

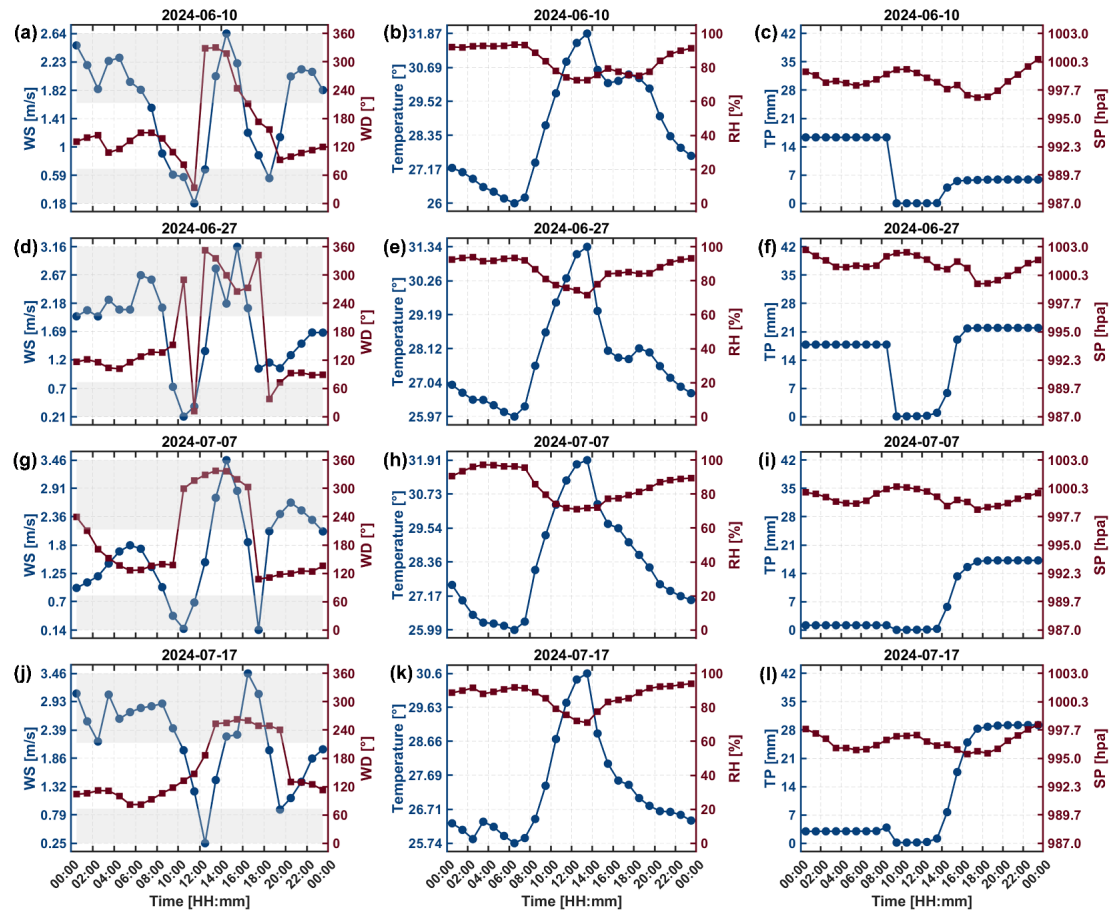

**Figure R3.** Time series of WS, WD, temperature, RH, Total precipitation (TP) and surface pressure (SP) throughout the four randomly selected case days. The gray shaded areas indicate periods of onshore flow.

Furthermore, the surface wind field confirms that the study area experienced weak background wind conditions during these periods, providing a favorable environment for the development of sea breeze systems (Fig. R4). Specifically, beginning around 09:00 LT, the wind field in the study area initiated a gradual shift, evolving into a stable onshore flow by 14:00 LT. This clear progression, consistent with the established physical mechanism of SB development, collectively validates the effectiveness of ORA.



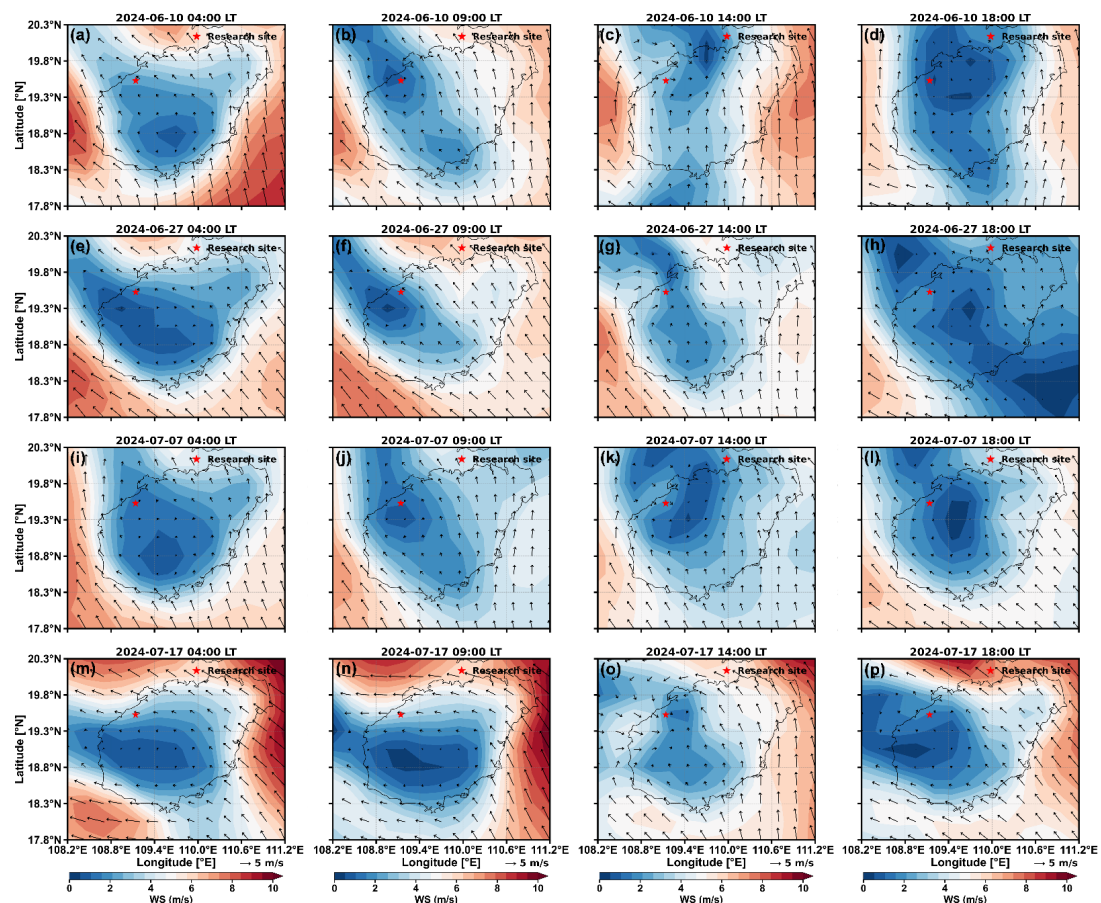

**Figure R4.** Surface wind fields for the four randomly selected cases, depicting the evolution at 04:00 LT, 09:00 LT, 14:00 LT, and 18:00 LT. The wind vector scaling is annotated in the lower right panel.

Although previous studies have reported sea-breeze frequencies over Hainan Island, the absence of published event dates prevents direct comparison (Liang and Wang, 2017; Liang et al., 2017; Tang, 2015; Zhang et al., 2014). Given the short study period, we were able to diagnose each day using an established manual identification method (MIM), which has been applied and validated in earlier work (Azorin-Molina et al., 2011). Following this method, we identified 34 SBDs and compared them day by day with the ORA results, with the outcomes summarized in a confusion matrix (Table R1). Here, NSBDs refer to all remaining days after removing the manually identified SBDs.

Based on the cross matrix, the following standard performance metrics were calculated: (a) Overall Accuracy (ACC), representing the proportion of days on which both methods agree; (b) Probability of Detection (POD), representing the proportion of SBDs identified by the MIM that were also successfully detected by the ORA; (c) False Alarm Ratio (FAR), representing the proportion of SBDs identified by the ORA that were not confirmed by the MIM; and (d) F1-Score, defined as the harmonic mean of POD and Precision ( $1 - \text{FAR}$ ), which provides a comprehensive measure of model performance. The F1-Score ranges from 0 to 1, with higher values indicating better performance.

The calculated values were: ACC = 90.4%, POD = 82.4%, FAR = 9.7%, and an F1-Score = 86.2%. These results indicate strong agreement between our filtering algorithm



and the manual reference. The high overall accuracy and F1-score confirm the algorithm's robust performance. The primary discrepancy, reflected in the slightly lower POD, is attributable to the objective algorithm's stricter criterion for the persistence of onshore flow, particularly on days with less pronounced wind shifts (For details, see Channel 1 in the Text S1 and Fig. 2).

**Table R1. Cross Matrix: ORA versus MIM.**

| Category   | MIM: SBDs                                                               | MIM: NSBDs                                                               |
|------------|-------------------------------------------------------------------------|--------------------------------------------------------------------------|
| ORA: SBDs  | True Positive days ( $D_{TP}$ ): 28 days<br>Both methods agree are SBDs | False Positive days ( $D_{FP}$ ): 3 days<br>Only ORA identifies as SBDs  |
| ORA: NSBDs | False Negative days ( $D_{FN}$ ): 6 days<br>Only MIM identifies as SBDs | True Negative days ( $D_{TN}$ ): 57 days<br>Both methods agree are NSBDs |

Regarding the second question, we conducted a comparative analysis of temperature and relative humidity (RH) between ERA5\_Land and the nearest meteorological station to our study site—Danzhou station (19.31°N, 109.35°E, 170 m a.s.l.) (Fig. R5). However, it should be noted that although Danzhou station is the closest meteorological site available, it still far away from the measurement site (~33 km). Such distance may also contribute to the discrepancies in temperature and humidity. Overall, the comparison shows relatively high agreement of temperature and RH between these two data sources.

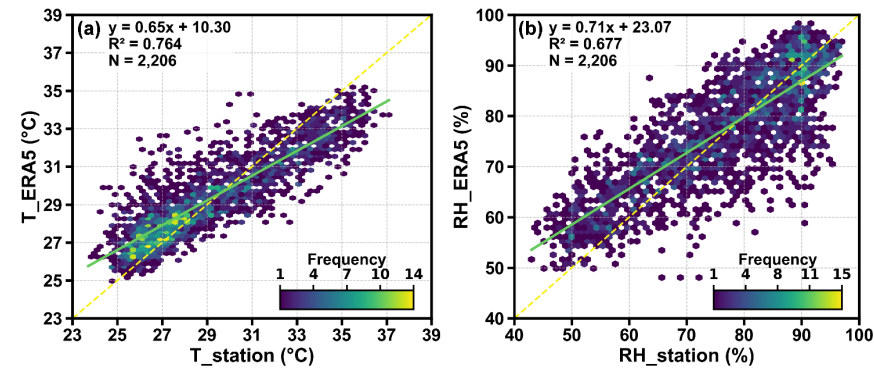

**Figure R5. Correlation between Temperature ( $T_{ERA5}$  and  $T_{station}$ ) and Humidity ( $RH_{ERA5}$  and  $RH_{station}$ ) from ERA5\_land and Danzhou Meteorological Station (19.31°N, 109.35°E) during summer 2024. The color of each hexagonal bin represents the frequency of data points within that grid cell. The yellow dashed line indicates the 1:1 line, and the green line shows the regression line between the two datasets.**

As shown in Fig. R6, the Danzhou station and ERA5\_Land exhibit broadly consistent variations in WS and wind direction WD throughout the study period. The ERA5\_Land WS is derived from the 10 m u- and v-wind components and represents grid-averaged conditions, whereas the Danzhou station is influenced by strong local surface roughness caused by nearby buildings and vegetation, resulting in lower observed WS. Despite these differences in magnitude, both datasets display similar prevailing wind directions on non-typhoon days, a shift toward southwesterly winds during typhoon periods, and

comparable diurnal patterns in WS, as shown in Fig. R6(b), (c) and (d).

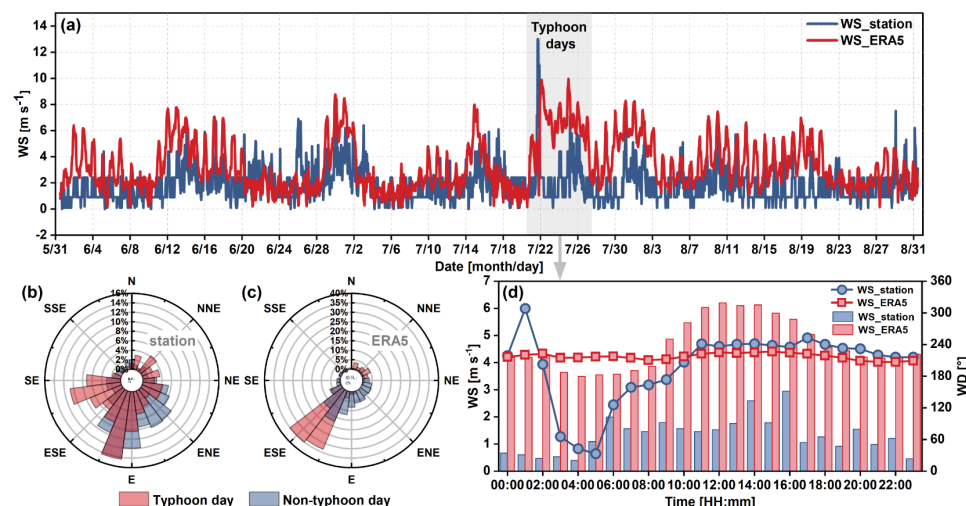

**Figure R6. Comparison of WS and WD between the Danzhou station and ERA5\_Land. (a) Hourly variations in WS for the Danzhou station and ERA5\_Land over the entire observation period; WD patterns at the (b) Danzhou station and (c) ERA5\_Land during typhoon and non-typhoon days; (d) Diurnal variations of mean WS and WD for the Danzhou station and ERA5\_Land on typhoon days. The gray shaded area indicates the range of the typhoon's duration. Wind direction is plotted in polar coordinates with percentage frequency indicated by concentric circles.**

Although ground-based observations can better capture near-surface meteorological conditions, their strong short-term fluctuations—particularly in wind fields—introduce substantial noise and complicate the identification of sea–land breeze circulations. More importantly, the Danzhou station is located far from the measurement site, making its data unrepresentative. In contrast, ERA5\_Land provides smoother and more continuous spatiotemporal fields that coherently depict the evolution of large- and mesoscale wind structures. As a result, ERA5\_Land has been widely applied in sea–land breeze research worldwide and is generally regarded as reliable and internally consistent for such analyses (Azorin-Molina et al., 2011; Hallgren et al., 2023; Xia et al., 2022; Zhao et al., 2022).

In summary, despite certain uncertainties, ERA5\_Land offers physically consistent estimates of all required variables and supplies complete, continuous, and quality-controlled time series—advantages that ground-based observations cannot fully match. The comparison with station measurements further confirms good agreement between these two datasets. These features make ERA5\_Land particularly suitable for investigating sea–land breeze circulations in this study.

16. P8, Line 170, daily averaged

R: Thank you for your comment. The missing word “averaged” after “daily” has been added in the revised manuscript. Please refer to Line 198.

17. P8, Line 173-175, Even in Beijing and Shanghai, AOD should also be lower in summer, how to get the conclusion of “typically exceeds 0.5”?

R: Thank you for your comment. Upon reviewing the latest literature, we found that the previously cited study on Beijing covers a period considerably earlier than this study, and its conclusions are therefore no longer directly applicable. After reviewing the recent reported averaged summer AOD in Beijing and Yangtze River Delta area, we have revised the manuscript accordingly to ensure that the discussion reflects the most up-to-date observations. Please refer to Line 201-203.

"The observed summer aerosol loading (mean AEC and AOD measuring  $0.11 \pm 0.03 \text{ km}^{-1}$  and  $0.29 \pm 0.1$ , respectively) exhibited markedly lower values compared to urban agglomerations like Beijing and Shanghai (where AOD is around 0.4) (Fan et al., 2025; Peng et al., 2025)....."

18. P9, Line 186: how to quantitatively evaluate "a clear decoupling between surface and column measurements for  $\text{NO}_2$ , HCHO, and CHOCHO, which was more pronounced in aerosols"?

R: Thank you for your comment. To quantitatively evaluating, we have analyzed relationships between surface and column integrated concentrations of  $\text{NO}_2$ , HCHO, and CHOCHO, as well as between surface aerosol extinction coefficients (AEC) and aerosol optical depth (AOD). The degree of decoupling can be inferred from the dispersion of data points—greater deviations from the linear regression line indicate weaker coupling between surface and column values. As shown in Fig. R7, both the  $R^2$  (0.34) and Pearson correlation coefficient (0.58) between AEC and AOD are notably lower than those for the trace gases, confirming a more pronounced decoupling in aerosol distributions. We have supplemented the relevant correlation results and discussion. Please refer to Line 221-223 and Fig. S7.

"..., which was more pronounced in aerosols as indicated by the weakest correlation ( $R^2=0.34$ ) between surface AEC and AOD (Fig. S6). These results suggest that the vertical distribution pattern of pollutants may involve more complex physicochemical processes that deserve further investigation."

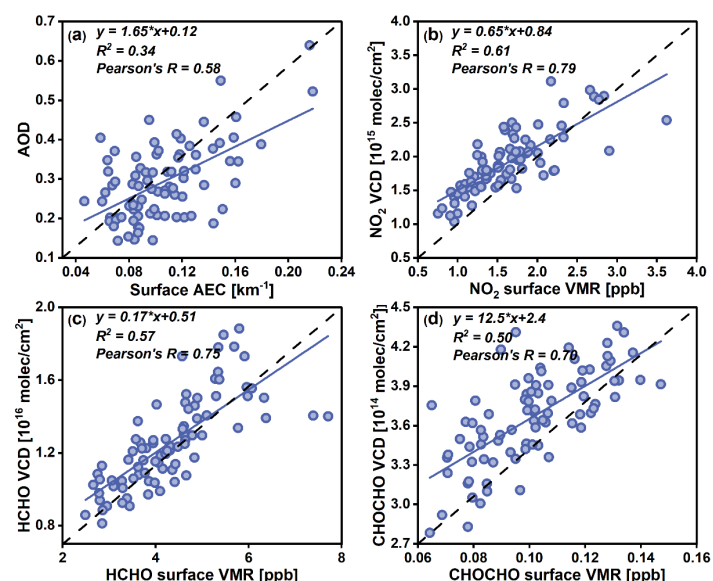

*Figure R7. Correlations between surface and column integrated concentrations of (a) aerosol; (b) NO<sub>2</sub>; (c) HCHO; and (d) CHOCHO during the observation period. The black dashed line represents the scaled reference line, while the blue solid line indicates the linear regression line. The regression equation, coefficient of determination ( $R^2$ ), and Pearson correlation coefficient are shown in the upper-left corner of each panel.*

19. P10, Line 199-202: Similarly, could the authors provide any quantitatively evidence between humidity and extinction to certificate the aerosol hygroscopic growth?

R: Thank you for your comment. In the Supplementary Materials, Figure R8 (as Figure S8) shows the Pearson correlation coefficients ( $r$ ) between AEC and RH at each altitude during the same time. The results indicate that the  $r$  coefficients between aerosols and RH at the same altitude are generally above 0.6. Particularly at an altitude of approximately 1 km, the correlation coefficient reaches 0.86, indicating a significant positive correlation between the two variables. Notably, negative correlations are observed in the lower boundary layer (0.3 and 0.5 km), which likely reflect the complex interplay between boundary-layer dynamics, local emissions, and turbulent mixing: near-surface aerosol concentrations can be influenced by local emissions that do not coincide with humidity peaks, while diurnal boundary-layer development and turbulent transport can redistribute aerosols, temporarily decoupling their variability from RH. We have supplemented the corresponding section of the manuscript with quantitative results to strengthen the robustness of these findings. Please refer to Line 232-236.

"Notably, the aerosol vertical distribution bears a remarkable similarity to the RH. The Pearson correlation between AEC and RH remains positive above 0.5 km, reaching a maximum of 0.86 around 1 km, indicating a strong positive relationship at this altitude (Fig. S8). This phenomenon reflects aerosol hygroscopic growth characteristics, particularly the water vapor sensitivity of fine particulate matter, which enhances light extinction at these altitudes (Liu et al., 2020)."

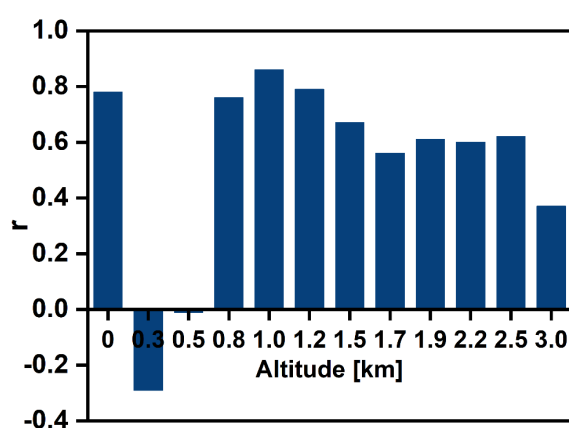

*Figure R8. Pearson correlation coefficients ( $r$ ) between AEC and RH at each altitude during the same time.*

20. P14-16: The discussion is too informative. Better to give a brief summary to characterize the difference of NO<sub>2</sub>, HCHO and CHOCHO between NSBDs and SBDs?

And how these differences regulated by the ACPs.

R: Thank you for your comment. We have revised the discussion to provide a more concise summary. Now, instead of a detailed descriptive account, we highlight the key differences in NO<sub>2</sub>, HCHO and CHOCHO between NSBDs and SBDs, and briefly explain how these differences are influenced by the ACPs. This makes the comparison clearer and keeps the focus on the mechanisms rather than extensive descriptive details. Please refer to Page 17-19.

21. Fig. S11: net ozone production ( $\Delta O_3$ ) → net ozone increment

R: Thank you for your comment. We have revised the term “net ozone production ( $\Delta O_3$ )” to “net ozone increment” in the caption for Fig. S11 (now Figure S14).

22. P21, Line 390-401: Can be draw a conclusion that which indicator, i.e. GNR and FNR, is better for diagnose the ozone formation sensitivity?

R: Thank you for your comment. We have discussed this issue in detail on Line 474-494. In brief, our R<sub>GF</sub> analysis indicates that sea-breeze and typhoon events transport BVOCs, which tends to shift the ozone chemical regime toward NO<sub>x</sub>-limited or transition conditions. The GNR results are consistent with this shift, whereas FNR shows a weaker response in the 400–1200 m layer, particularly under sea-breeze and typhoon conditions (Fig. 11). This suggests that GNR more reliably reflects changes in OFS. We note that FNR can be influenced by primary HCHO sources, which may bias sensitivity diagnostics (Liu et al., 2021), but our study lacks quantitative constraints to separate these effects. Overall, under BVOC-enhanced conditions, GNR provides a more robust indication of the shift toward NO<sub>x</sub>-limited or transition regimes than FNR, though further investigation is needed for full validation. We also followed your suggestion by removing unnecessary details and replacing them with more concise, summary-level descriptions to make the text clearer and more focused. Please refer to Line 481-494.

23. Fig. 10: It can be seen that the results of ozone formation sensitivity are quite different obtained by using different indicators. So which one is more reliable? Or any preference for using under different ACPs?

R: Thank you for your comment. This issue has been addressed in our response to Comment #22. As discussed, GNR performs more consistently under BVOC-enhanced or BVOC-dominated conditions, whereas FNR may be biased by primary HCHO emissions. Further validation is still needed, as detailed in our response to Comment 22 and in the revised manuscript. Please refer to Line 474-494.

24. Also the OFS regimes shifted across different layers, can it be driven by some key meteorological parameters in view of the ACPs?

R: Thank you for your comment. The vertical distribution of the OFS is closely linked to the relative concentrations of  $\text{NO}_2$ ,  $\text{HCHO}$ , and  $\text{CHOCHO}$ , which are in turn strongly influenced by meteorological conditions. Among these factors, wind direction plays the dominant role.

For example, during the passage of Typhoon "Prapiroon", although the typhoon's overall trajectory moved from southeast to northwest across the study region, the near-surface winds remained predominantly southwesterly, while winds above 1 km shifted to westerly (Fig. R9 and also Fig. S12). On the one hand, the typhoon's movement transported BVOCs emitted from the Wuzhi Mountain toward the measurement site. On the other hand, the local wind structure facilitated the inflow of pollutants from upwind regions with high  $\text{NO}_2$  emissions. Notably, at higher altitudes, the WD was consistent with that of the near-surface sea breeze, favoring the presence of  $\text{NO}_2$  aloft. In addition, persistent upward motion likely enhanced this vertical pattern, leading to VOC-limited region in the upper layers as indicated by both FNG and GNR diagnostics. In contrast, other meteorological parameters—such as temperature, RH, and BLH—exerted secondary influences in comparison.

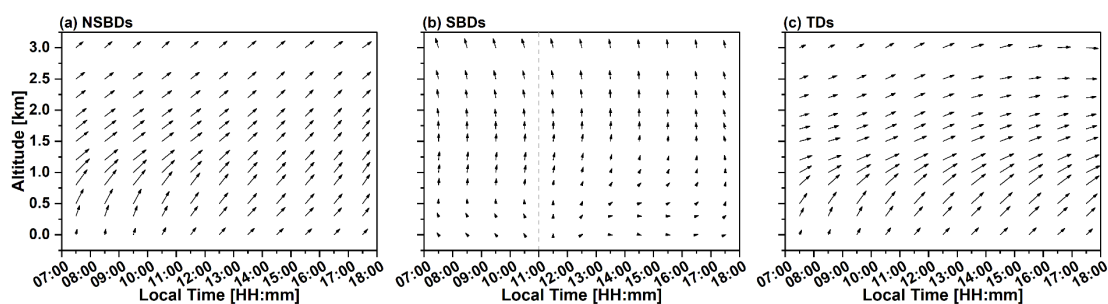

**Figure R9.** Wind profiles for different air current patterns. The lengths of the arrows indicate the magnitude of the wind speeds and they are subjected to the same scaling factor on the three air current patterns (ACPs). The gray dotted line refers to the  $O_{\text{time}}$  of the SB.

We have also made a brief summary about this issue in Line 484-486.

"An interesting feature is that both metrics exhibit VOC-limitation aloft on TDs, likely because upper-level winds align with the SB pathway and transport upstream  $\text{NO}_x$  into the region. Such behavior shows that WD may be a key factor driving OFS transitions across different ACPs (Fig. S12)."

25. A general comment that it is too informatively described in the manuscript. I recommend the authors can simplify and shorten some parts to some degree.

R: Thank you for your comment. In the revised manuscript, we have streamlined several sections by removing redundant descriptions and condensing overly detailed explanations. These revisions help to improve readability and highlight the key findings more clearly.

## Reference:

Azorin-Molina, C., Tijm, S., and Chen, D.: Development of selection algorithms and databases for sea



- breeze studies, *Theor. Appl. Climatol.*, 106, 531-546, <https://doi.org/10.1007/s00704-011-0454-4>, 2011.
- Baidar, S., Oetjen, H., Coburn, S., Dix, B., Ortega, I., Sinreich, R., and Volkamer, R.: The CU Airborne MAX-DOAS instrument: vertical profiling of aerosol extinction and trace gases, *Atmos. Meas. Tech.*, 6, 719-739, <https://doi.org/10.5194/amt-6-719-2013>, 2013.
- Chan, K. L., Wiegner, M., van Geffen, J., De Smedt, I., Alberti, C., Cheng, Z., Ye, S., and Wenig, M.: MAX-DOAS measurements of tropospheric NO<sub>2</sub> and HCHO in Munich and the comparison to OMI and TROPOMI satellite observations, *Atmos. Meas. Tech.*, 13, 4499-4520, <https://doi.org/10.5194/amt-13-4499-2020>, 2020.
- Chan Miller, C., Gonzalez Abad, G., Wang, H., Liu, X., Kurosu, T., Jacob, D. J., and Chance, K.: Glyoxal retrieval from the Ozone Monitoring Instrument, *Atmos. Meas. Tech.*, 7, 3891-3907, <https://doi.org/10.5194/amt-7-3891-2014>, 2014.
- Chen, Y., Liu, C., Su, W., Hu, Q., Zhang, C., Liu, H., and Yin, H.: Identification of volatile organic compound emissions from anthropogenic and biogenic sources based on satellite observation of formaldehyde and glyoxal, *Sci. Total Environ.*, 859, 159997, <https://doi.org/10.1016/j.scitotenv.2022.159997>, 2023.
- DiGangi, J. P., Henry, S. B., Kammrath, A., Boyle, E. S., Kaser, L., Schnitzhofer, R., Graus, M., Turnipseed, A., Park, J. H., Weber, R. J., Hornbrook, R. S., Cantrell, C. A., Maudlin Iii, R. L., Kim, S., Nakashima, Y., Wolfe, G. M., Kajii, Y., Apel, E. C., Goldstein, A. H., Guenther, A., Karl, T., Hansel, A., and Keutsch, F. N.: Observations of glyoxal and formaldehyde as metrics for the anthropogenic impact on rural photochemistry, *Atmos. Chem. Phys.*, 12, 9529-9543, <https://doi.org/10.5194/acp-12-9529-2012>, 2012.
- Fan, C., de Leeuw, G., Yan, X., Dong, J., Kang, H., Fang, C., Li, Z., and Zhang, Y.: Evolution of aerosol optical depth over China in 2010–2024: increasing importance of meteorological influences, *Atmos. Chem. Phys.*, 25, 11951-11973, <https://doi.org/10.5194/acp-25-11951-2025>, 2025.
- Frieß, U., Beirle, S., Alvarado Bonilla, L., Bösch, T., Friedrich, M. M., Hendrick, F., PETERS, A., Richter, A., van Roozendaal, M., Rozanov, V. V., Spinei, E., Tirpitz, J. L., Vlemmix, T., Wagner, T., and Wang, Y.: Intercomparison of MAX-DOAS vertical profile retrieval algorithms: studies using synthetic data, *Atmos. Meas. Tech.*, 12, 2155-2181, <https://doi.org/10.5194/amt-12-2155-2019>, 2019.
- Hallgren, C., Körnich, H., Ivanell, S., and Sahlée, E.: A Single-Column Method to Identify Sea and Land Breezes in Mesoscale-Resolving NWP Models, *Weather Forecasting*, 38, 1025-1039, <https://doi.org/10.1175/WAF-D-22-0163.1>, 2023.
- Hong, Q., Liu, C., Hu, Q., Zhang, Y., Xing, C., Ou, J., Tan, W., Liu, H., Huang, X., and Wu, Z.: Vertical distribution and temporal evolution of formaldehyde and glyoxal derived from MAX-DOAS observations: The indicative role of VOC sources, *J Environ Sci (China)*, 122, 92-104, <https://doi.org/10.1016/j.jes.2021.09.025>, 2022.
- Hong, Q., Xing, J., Xing, C., Yang, B., Su, W., Chen, Y., Zhang, C., Zhu, Y., and Liu, C.: Investigating vertical distributions and photochemical indications of formaldehyde, glyoxal, and NO<sub>2</sub> from MAX-DOAS observations in four typical cities of China, *Sci. Total Environ.*, 954, <https://doi.org/10.1016/j.scitotenv.2024.176447>, 2024.

- Hoque, H. M. S., Irie, H., and Damiani, A.: First MAX-DOAS Observations of Formaldehyde and Glyoxal in Phimai, Thailand, *J. Geophys. Res.: Atmos.*, 123, 9957-9975, <https://doi.org/10.1029/2018JD028480>, 2018.
- Jiang, Z., Wang, S., Yan, Y., Zhang, S., Xue, R., Gu, C., Zhu, J., Liu, J., and Zhou, B.: Constructing the 3D Spatial Distribution of the HCHO/NO<sub>2</sub> Ratio via Satellite Observation and Machine Learning Model, *Environ. Sci. Technol.*, 59, 4047-4058, <https://doi.org/10.1021/acs.est.4c12362>, 2025.
- Kaiser, J., Wolfe, G. M., Min, K. E., Brown, S. S., Miller, C. C., Jacob, D. J., deGouw, J. A., Graus, M., Hanisco, T. F., Holloway, J., Peischl, J., Pollack, I. B., Ryerson, T. B., Warneke, C., Washenfelder, R. A., and Keutsch, F. N.: Reassessing the ratio of glyoxal to formaldehyde as an indicator of hydrocarbon precursor speciation, *Atmos. Chem. Phys.*, 15, 7571-7583, <https://doi.org/10.5194/acp-15-7571-2015>, 2015.
- Kumar, V., Beirle, S., Dörner, S., Mishra, A. K., Donner, S., Wang, Y., Sinha, V., and Wagner, T.: Long-term MAX-DOAS measurements of NO<sub>2</sub>, HCHO, and aerosols and evaluation of corresponding satellite data products over Mohali in the Indo-Gangetic Plain, *Atmos. Chem. Phys.*, 20, 14183-14235, <https://doi.org/10.5194/acp-20-14183-2020>, 2020.
- Lerot, C., Hendrick, F., Van Roozendaal, M., Alvarado, L. M. A., Richter, A., De Smedt, I., Theys, N., Vlietinck, J., Yu, H., Van Gent, J., Stavrakou, T., Müller, J. F., Valks, P., Loyola, D., Irie, H., Kumar, V., Wagner, T., Schreier, S. F., Sinha, V., Wang, T., Wang, P., and Retscher, C.: Glyoxal tropospheric column retrievals from TROPOMI – multi-satellite intercomparison and ground-based validation, *Atmos. Meas. Tech.*, 14, 7775-7807, <https://doi.org/10.5194/amt-14-7775-2021>, 2021.
- Liang, Z. and Wang, D.: Sea breeze and precipitation over Hainan Island, *Q. J. R. Meteorolog. Soc.*, 143, 137-151, <https://doi.org/10.1002/qj.2952>, 2017.
- Liang, Z., Wang, D., Liu, Y., and Cai, Q.: A numerical study of the convection triggering and propagation associated with sea breeze circulation over Hainan Island, *J. Geophys. Res.: Atmos.*, 122, 8567-8592, <https://doi.org/10.1002/2016JD025915>, 2017.
- Liu, J., Li, X., Tan, Z., Wang, W., Yang, Y., Zhu, Y., Yang, S., Song, M., Chen, S., Wang, H., Lu, K., Zeng, L., and Zhang, Y.: Assessing the Ratios of Formaldehyde and Glyoxal to NO<sub>2</sub> as Indicators of O<sub>3</sub>–NO<sub>x</sub>–VOC Sensitivity, *Environ. Sci. Technol.*, 55, 10935-10945, <https://doi.org/10.1021/acs.est.0c07506>, 2021.
- MacDonald, S. M., Oetjen, H., Mahajan, A. S., Whalley, L. K., Edwards, P. M., Heard, D. E., Jones, C. E., and Plane, J. M. C.: DOAS measurements of formaldehyde and glyoxal above a south-east Asian tropical rainforest, *Atmos. Chem. Phys.*, 12, 5949-5962, <https://doi.org/10.5194/acp-12-5949-2012>, 2012.
- Martin, R. V., Parrish, D. D., Ryerson, T. B., Nicks Jr., D. K., Chance, K., Kurosu, T. P., Jacob, D. J., Sturges, E. D., Fried, A., and Wert, B. P.: Evaluation of GOME satellite measurements of tropospheric NO<sub>2</sub> and HCHO using regional data from aircraft campaigns in the southeastern United States, *J. Geophys. Res.: Atmos.*, 109, <https://doi.org/10.1029/2004JD004869>, 2004.
- Peng, S., Zheng, Y., Li, L., Gui, K., Zhu, J., Liu, S., Zhang, H., Zhao, H., Che, H., and Zhang, X.: Long-term variations in aerosol optical properties in Beijing: insights from diurnal and nocturnal continuous measurements, *Atmos. Environ.*, 360, 121416, <https://doi.org/10.1016/j.atmosenv.2025.121416>, 2025.

- Ren, B., Xie, P., Xu, J., Li, A., Tian, X., Hu, Z., Huang, Y., Li, X., Zhang, Q., Ren, H., and Ji, H.: Use of the PSCF method to analyze the variations of potential sources and transports of NO<sub>2</sub>, SO<sub>2</sub>, and HCHO observed by MAX-DOAS in Nanjing, China during 2019, *Sci. Total Environ.*, 782, 146865, <https://doi.org/10.1016/j.scitotenv.2021.146865>, 2021.
- Ren, H., Li, A., Xie, P., Hu, Z., Xu, J., Huang, Y., Li, X., Zhong, H., Zhang, H., Tian, X., Ren, B., Wang, S., Chai, W., and Du, C.: The Characterization of Haze and Dust Processes Using MAX-DOAS in Beijing, China, *Remote Sens.*, 13, 5133, <https://www.mdpi.com/2072-4292/13/24/5133>, 2021.
- Schreier, S. F., Richter, A., Peters, E., Ostendorf, M., Schmalwieser, A. W., Weihs, P., and Burrows, J. P.: Dual ground-based MAX-DOAS observations in Vienna, Austria: Evaluation of horizontal and temporal NO<sub>2</sub>, HCHO, and CHOCHO distributions and comparison with independent data sets, *Atmos. Environ.: X*, 5, 100059, <https://doi.org/10.1016/j.aeaoa.2019.100059>, 2020.
- Schreier, S. F., Richter, A., Wittrock, F., and Burrows, J. P.: Estimates of free-tropospheric NO<sub>2</sub> and HCHO mixing ratios derived from high-altitude mountain MAX-DOAS observations at midlatitudes and in the tropics, *Atmos. Chem. Phys.*, 16, 2803-2817, <https://doi.org/10.5194/acp-16-2803-2016>, 2016.
- Tan, W., Liu, C., Wang, S., Xing, C., Su, W., Zhang, C., Xia, C., Liu, H., Cai, Z., and Liu, J.: Tropospheric NO<sub>2</sub>, SO<sub>2</sub>, and HCHO over the East China Sea, using ship-based MAX-DOAS observations and comparison with OMI and OMPS satellite data, *Atmos. Chem. Phys.*, 18, 15387-15402, <https://doi.org/10.5194/acp-18-15387-2018>, 2018.
- Tang, X. L.: A Typical Sea-Land Breeze Process in Hainan Island, *Applied Mechanics and Materials*, 733, 387 - 390, 2015.
- Vlemmix, T., Hendrick, F., Pinardi, G., De Smedt, I., Fayt, C., Hermans, C., PETERS, A., Wang, P., Levelt, P., and Van Roozendael, M.: MAX-DOAS observations of aerosols, formaldehyde and nitrogen dioxide in the Beijing area: comparison of two profile retrieval approaches, *Atmos. Meas. Tech.*, 8, 941-963, <https://doi.org/10.5194/amt-8-941-2015>, 2015.
- Vrekoussis, M., Wittrock, F., Richter, A., and Burrows, J. P.: GOME-2 observations of oxygenated VOCs: what can we learn from the ratio glyoxal to formaldehyde on a global scale?, *Atmos. Chem. Phys.*, 10, 10145-10160, <https://doi.org/10.5194/acp-10-10145-2010>, 2010.
- Wagner, T., Beirle, S., Brauers, T., Deutschmann, T., Friess, U., Hak, C., Halla, J. D., Heue, K. P., Junkermann, W., Li, X., Platt, U., and Pundt-Gruber, I.: Inversion of tropospheric profiles of aerosol extinction and HCHO and NO<sub>2</sub> mixing ratios from MAX-DOAS observations in Milano during the summer of 2003 and comparison with independent data sets, *Atmos. Meas. Tech.*, 4, 2685-2715, <https://doi.org/10.5194/amt-4-2685-2011>, 2011.
- Wang, Y., Li, A., Xie, P.-H., Chen, H., Xu, J., Wu, F.-C., Liu, J.-G., and Liu, W.-Q.: Retrieving vertical profile of aerosol extinction by multi-axis differential optical absorption spectroscopy, *Acta Physica Sinica*, 62, 180705-180705, <https://doi.org/10.7498/aps.62.180705>, 2013.
- Xia, G., Draxl, C., Optis, M., and Redfern, S.: Detecting and characterizing simulated sea breezes over the US northeastern coast with implications for offshore wind energy, *Wind Energ. Sci.*, 7, 815-829, <https://doi.org/10.5194/wes-7-815-2022>, 2022.
- Xing, C., Liu, C., Hong, Q., Liu, H., Wu, H., Lin, J., Song, Y., Chen, Y., Liu, T., Hu, Q., Tan, W., and Lin,

- H.: Vertical distributions and potential sources of wintertime atmospheric pollutants and the corresponding ozone production on the coast of Bohai Sea, *J. Environ. Manage.*, 319, 115721, <https://doi.org/10.1016/j.jenvman.2022.115721>, 2022.
- Xing, C., Liu, C., Hu, Q., Fu, Q., Lin, H., Wang, S., Su, W., Wang, W., Javed, Z., and Liu, J.: Identifying the wintertime sources of volatile organic compounds (VOCs) from MAX-DOAS measured formaldehyde and glyoxal in Chongqing, southwest China, *Sci. Total Environ.*, 715, 136258, <https://doi.org/10.1016/j.scitotenv.2019.136258>, 2020.
- Zhang, R., Wang, S., Zhang, S., Xue, R., Zhu, J., and Zhou, B.: MAX-DOAS observation in the midlatitude marine boundary layer: Influences of typhoon forced air mass, *J. Environ. Sci.*, 120, 63-73, <https://doi.org/10.1016/j.jes.2021.12.010>, 2022.
- Zhang, S., Wang, S., Zhang, R., Guo, Y., Yan, Y., Ding, Z., and Zhou, B.: Investigating the Sources of Formaldehyde and Corresponding Photochemical Indications at a Suburb Site in Shanghai From MAX-DOAS Measurements, *J. Geophys. Res.: Atmos.*, 126, <https://doi.org/10.1029/2020jd033351>, 2021.
- Zhang, Y., Man, X., Zhang, S., Liu, L., Kong, F., Feng, T., and Liu, R.: Ground-based MAX-DOAS observations of formaldehyde and glyoxal in Xishuangbanna, China, *J. Environ. Sci.*, 152, 328-339, <https://doi.org/10.1016/j.jes.2024.04.036>, 2025.
- Zhang, Z.-z., Cao, C.-x., Song, Y., Kang, L., and Cai, X.-h.: STATISTICAL CHARACTERISTICS AND NUMERICAL SIMULATION OF SEA-LAND BREEZES IN HAINAN ISLAND, *J. Trop. Meteorol.*, 20, 267-278, <https://jtm.itmm.org.cn/en/article/id/20140309>, 2014.
- Zhao, D., Xin, J., Wang, W., Jia, D., Wang, Z., Xiao, H., Liu, C., Zhou, J., Tong, L., Ma, Y., Wen, T., Wu, F., and Wang, L.: Effects of the sea-land breeze on coastal ozone pollution in the Yangtze River Delta, China, *Sci. Total Environ.*, 807, <https://doi.org/10.1016/j.scitotenv.2021.150306>, 2022.
